# Supplementary material
Source: PubMed Central journal article supplement (PMC7061344)
Supplement: NIHMS1564699-supplement-1.pdf [file NIHMS1564699-supplement-1.pdf]

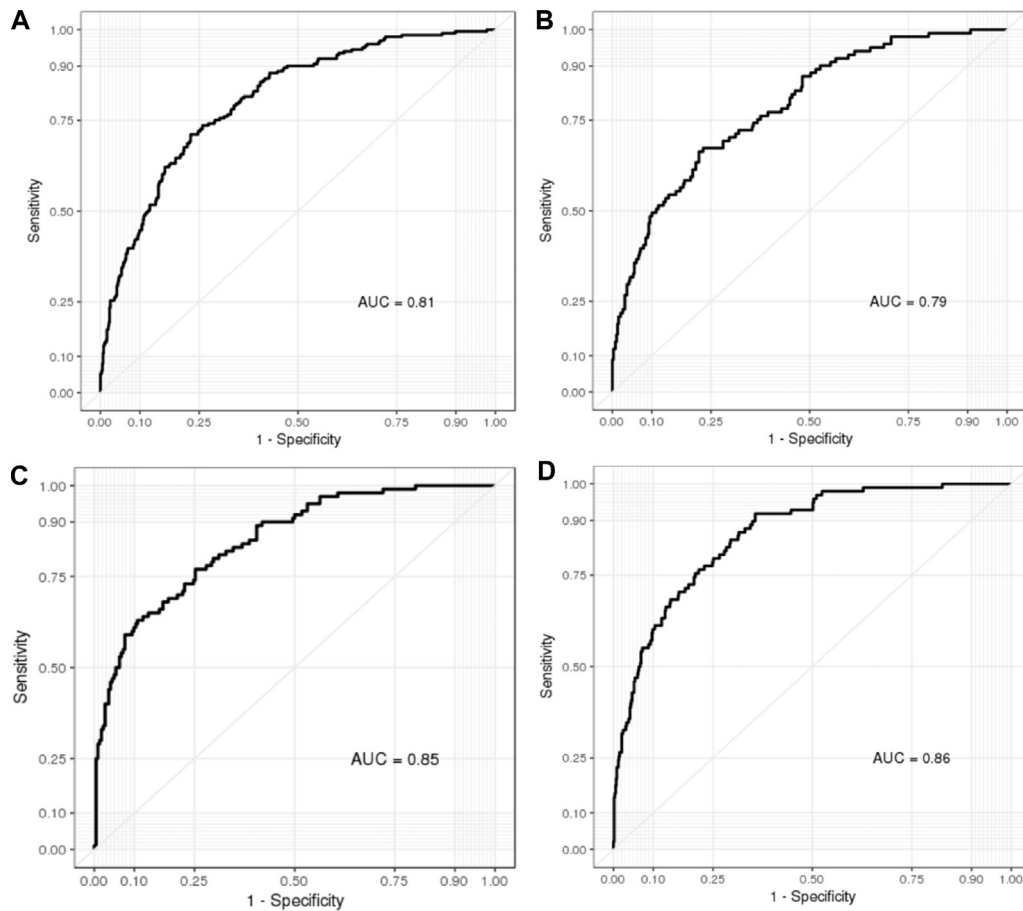

**FIG E1.** **A**, ROC curve for clinical asthma remission with an AUC of 0.81 (95% CI, 0.77-0.84). **B**, ROC curve for clinical asthma remission in male subjects with an AUC of 0.79 (95% CI, 0.75-0.84). **C**, ROC curve for clinical asthma remission in female subjects with an AUC of 0.85 (95% CI, 0.80-0.89). **D**, ROC curve for strict asthma remission with an AUC of 0.86 (95% CI, 0.83-0.90).

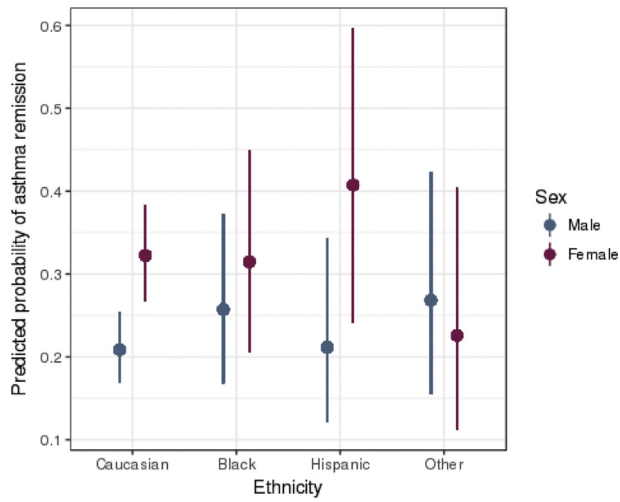

**FIG E2.** Among female subjects, the predicted probability of asthma remission was greater in Hispanic compared with white subjects (OR, 5.67; 95% CI, 1.57-21.28;  $P = .009$ ), black subjects (OR, 8.45; 95% CI, 1.99-38.93;  $P = .005$ ), and subjects of other ethnicities (OR, 13.89; 95% CI, 2.83-76.24;  $P = .003$ ). Race was not associated with asthma remission status in male subjects.

**TABLE E1.** Baseline characteristics of participants in CAMP stratified by adult clinical asthma remission follow-up status

|                                                              | Participants with adult asthma<br>remission follow-up (n = 879) | Participants lost to adult asthma<br>remission follow-up (n = 162) | P value |
|--------------------------------------------------------------|-----------------------------------------------------------------|--------------------------------------------------------------------|---------|
| Baseline age (y), mean $\pm$ SD                              | 8.8 $\pm$ 2.1                                                   | 9.7 $\pm$ 2.2                                                      | <.001   |
| Age at asthma diagnosis (y), mean $\pm$ SD                   | 3.8 $\pm$ 2.5                                                   | 4.2 $\pm$ 2.9                                                      | .12     |
| Sex                                                          |                                                                 |                                                                    | .68     |
| Male                                                         | 522 (59.4%)                                                     | 99 (61.1%)                                                         |         |
| Female                                                       | 357 (40.6%)                                                     | 63 (38.9%)                                                         |         |
| Ethnicity                                                    |                                                                 |                                                                    | <.001   |
| White                                                        | 604 (68.7%)                                                     | 0 (0.0%)                                                           |         |
| Black                                                        | 124 (14.1%)                                                     | 107 (76.4%)                                                        |         |
| Hispanic                                                     | 79 (9.0%)                                                       | 14 (10.0%)                                                         |         |
| Other                                                        | 72 (8.2%)                                                       | 19 (13.6%)                                                         |         |
| Baseline household income                                    |                                                                 |                                                                    | .004    |
| <\$29,999                                                    | 188 (22.3%)                                                     | 54 (34.6%)                                                         |         |
| \$30,000-\$49,999                                            | 286 (33.9%)                                                     | 48 (30.8%)                                                         |         |
| $\geq$ \$50,000                                              | 370 (43.8%)                                                     | 54 (34.6%)                                                         |         |
| Parental highest education                                   |                                                                 |                                                                    | .23     |
| High school or less                                          | 151 (17.2%)                                                     | 34 (21.1%)                                                         |         |
| Some college or higher                                       | 728 (82.8%)                                                     | 127 (78.9%)                                                        |         |
| CAMP treatment group                                         |                                                                 |                                                                    | .46     |
| Budesonide                                                   | 256 (29.1%)                                                     | 55 (34.0%)                                                         |         |
| Nedocromil                                                   | 267 (30.4%)                                                     | 45 (27.8%)                                                         |         |
| Placebo                                                      | 356 (40.5%)                                                     | 62 (38.3%)                                                         |         |
| Parental history of asthma                                   | 364 (44.5%)                                                     | 63 (40.9%)                                                         | .41     |
| Body mass index (kg/m <sup>2</sup> ), mean $\pm$ SD          | 18.1 $\pm$ 3.4                                                  | 18.6 $\pm$ 3.9                                                     | .07     |
| Wheezes with colds                                           | 800 (91.1%)                                                     | 149 (92.0%)                                                        | .72     |
| Wheezes apart from colds                                     | 692 (78.8%)                                                     | 136 (84.0%)                                                        | .14     |
| Exacerbations after exercise                                 | 691 (78.7%)                                                     | 140 (87.0%)                                                        | .02     |
| Aeroallergen sensitization on skin testing                   | 774 (88.1%)                                                     | 140 (86.4%)                                                        | .56     |
| History of physician-diagnosed allergies                     | 597 (67.9%)                                                     | 121 (75.2%)                                                        | .07     |
| Exposure to home tobacco smoke                               | 353 (40.4%)                                                     | 86 (53.1%)                                                         | .003    |
| Baseline asthma severity                                     |                                                                 |                                                                    | .67     |
| Mild                                                         | 423 (48.1%)                                                     | 75 (46.3%)                                                         |         |
| Moderate                                                     | 456 (51.9%)                                                     | 87 (53.7%)                                                         |         |
| Baseline PC <sub>20</sub> (mg/mL), median $\pm$ IQR          | 1.1 $\pm$ 2.1                                                   | 1.1 $\pm$ 3.0                                                      | .36     |
| Baseline FEV <sub>1</sub> (% predicted), mean $\pm$ SD       | 93.9 $\pm$ 14.1                                                 | 92.9 $\pm$ 15.3                                                    | .32     |
| Baseline FEV <sub>1</sub> /FVC ratio (%), mean $\pm$ SD      | 79.9 $\pm$ 8.3                                                  | 78.6 $\pm$ 8.9                                                     | .09     |
| Baseline serum IgE level (ng/mL), median $\pm$ IQR           | 460.0 $\pm$ 1094.8                                              | 393.0 $\pm$ 874.0                                                  | .32     |
| Baseline eosinophil count (cells/ $\mu$ L), median $\pm$ IQR | 400.0 $\pm$ 440.0                                               | 388.5 $\pm$ 429.5                                                  | .74     |
| Atopic dermatitis                                            | 145 (76.7%)                                                     | 44 (74.6%)                                                         | .15     |
| Mother smoked while pregnant                                 | 90 (13.9%)                                                      | 31 (13.5%)                                                         | .17     |
| Used wood stove for heating or cooking                       | 67 (10.3%)                                                      | 16 (7.0%)                                                          | .94     |
| Pet ownership                                                | 51 (7.8%)                                                       | 12 (5.2%)                                                          | .14     |
| Clinic site                                                  |                                                                 |                                                                    | <.001   |
| Albuquerque                                                  | 100 (11.4%)                                                     | 12 (13.0%)                                                         |         |
| Baltimore                                                    | 108 (12.3%)                                                     | 20 (12.3%)                                                         |         |
| Boston                                                       | 112 (12.7%)                                                     | 12 (7.4%)                                                          |         |
| Denver                                                       | 109 (12.4%)                                                     | 35 (21.6%)                                                         |         |
| San Diego                                                    | 97 (11.0%)                                                      | 25 (15.4%)                                                         |         |
| Seattle                                                      | 123 (14.0%)                                                     | 21 (13.0%)                                                         |         |
| St Louis                                                     | 126 (14.3%)                                                     | 7 (4.3%)                                                           |         |
| Toronto                                                      | 104 (11.8%)                                                     | 21 (13.0%)                                                         |         |

IQR, Interquartile range.

**TABLE E2.** Baseline predictors of clinical asthma remission with FEV<sub>1</sub>/FVC ratio excluded from the definition\*†

| Variable                                       | OR   | 95% CI    | P value |
|------------------------------------------------|------|-----------|---------|
| Female sex                                     | 0.62 | 0.45-0.86 | .004    |
| Moderate baseline asthma severity‡             | 0.71 | 0.51-0.99 | .04     |
| 10% Increase in FEV <sub>1</sub> /FVC ratio    | 1.39 | 1.12-1.72 | .003    |
| Two-fold increase in baseline PC <sub>20</sub> | 1.22 | 1.10-1.37 | <.001   |
| Two-fold increase in serum IgE level           | 0.82 | 0.75-0.89 | <.001   |

\*Covariates included in the cross-validated model: age, race, CAMP treatment group, clinic site, household income level, history of exacerbations after exercise, history of exposure to home tobacco smoke, and serum eosinophil count.

†Quantitative variables were modeled continuously.

‡Reference level: mild baseline physician-classified asthma severity.

**TABLE E3.** Baseline characteristics for the participants included in the secondary strict asthma remission outcome analysis stratified by asthma remission status (n = 741)

|                                                     | No asthma remission (n = 630) | Strict asthma remission (n = 111) | P value |
|-----------------------------------------------------|-------------------------------|-----------------------------------|---------|
| Baseline age (y), mean ± SD                         | 8.7 ± 2.1                     | 8.2 ± 1.8                         | .01     |
| Age at asthma diagnosis (y), mean ± SD              | 3.8 ± 2.5                     | 4.1 ± 2.5                         | .16     |
| Sex                                                 |                               |                                   | .09     |
| Male                                                | 388 (61.6%)                   | 59 (53.2%)                        |         |
| Female                                              | 242 (38.4%)                   | 52 (46.8%)                        |         |
| Ethnicity                                           |                               |                                   | .83     |
| White                                               | 430 (68.3%)                   | 79 (71.2%)                        |         |
| Black                                               | 92 (14.6%)                    | 15 (13.5%)                        |         |
| Hispanic                                            | 53 (8.4%)                     | 10 (9.0%)                         |         |
| Other                                               | 55 (8.7%)                     | 7 (6.3%)                          |         |
| Baseline household income (USD)                     |                               |                                   | .61     |
| <\$29,999                                           | 134 (22.1%)                   | 26 (24.5%)                        |         |
| \$30,000-\$49,999                                   | 212 (35.0%)                   | 32 (30.2%)                        |         |
| ≥\$50,000                                           | 259 (42.8%)                   | 48 (45.3%)                        |         |
| Parental highest education                          |                               |                                   | .82     |
| High school or less                                 | 102 (16.2%)                   | 17 (15.3%)                        |         |
| Some college or higher                              | 528 (83.8%)                   | 94 (84.7%)                        |         |
| CAMP treatment group                                |                               |                                   | .29     |
| Budesonide                                          | 169 (26.8%)                   | 36 (32.4%)                        |         |
| Nedocromil                                          | 201 (31.9%)                   | 28 (25.2%)                        |         |
| Placebo                                             | 260 (41.3%)                   | 47 (42.3%)                        |         |
| Parental history of asthma                          | 259 (43.9%)                   | 39 (40.2%)                        | .50     |
| Body mass index (kg/m <sup>2</sup> ), mean ± SD     | 18.1 ± 3.4                    | 18.0 ± 3.1                        | .85     |
| Wheezes with colds                                  | 579 (92.1%)                   | 93 (83.8%)                        | .005    |
| Wheezes apart from colds                            | 505 (80.3%)                   | 69 (62.2%)                        | <.001   |
| Exacerbations after exercise                        | 503 (79.8%)                   | 76 (69.1%)                        | .01     |
| Aeroallergen sensitization on skin testing          | 571 (90.6%)                   | 82 (73.9%)                        | <.001   |
| History of physician-diagnosed allergies            | 439 (69.7%)                   | 62 (55.9%)                        | .004    |
| Exposure to home tobacco smoke                      | 252 (40.3%)                   | 47 (42.3%)                        | .68     |
| Baseline asthma severity                            |                               |                                   | .003    |
| Mild                                                | 290 (46.0%)                   | 68 (61.3%)                        |         |
| Moderate                                            | 340 (54.0%)                   | 43 (38.7%)                        |         |
| Baseline PC <sub>20</sub> (mg/mL), median ± IQR     | 1.0 ± 1.6                     | 2.8 ± 4.5                         | <.001   |
| Baseline FEV <sub>1</sub> (% predicted), mean ± SD  | 93.1 ± 13.9                   | 102.7 ± 11.3                      | <.001   |
| Baseline FEV <sub>1</sub> /FVC ratio (%), mean ± SD | 78.8 ± 8.1                    | 87.2 ± 4.9                        | <.001   |
| Baseline serum IgE level (ng/mL), median ± IQR      | 527.5 ± 1207.0                | 191.5 ± 629.5                     | <.001   |
| Baseline eosinophil count (cells/μL), median ± IQR  | 440.0 ± 471.0                 | 240.0 ± 310.0                     | <.001   |
| Atopic dermatitis                                   | 146 (76.8%)                   | 20 (76.9%)                        | .99     |
| Mother smoked while pregnant                        | 82 (13.1%)                    | 12 (10.8%)                        | .51     |
| Used wood stove for heating or cooking              | 58 (9.2%)                     | 7 (6.3%)                          | .32     |
| Pet ownership                                       | 48 (7.6%)                     | 4 (3.6%)                          | .13     |
| Clinic site                                         |                               |                                   | .09     |
| Albuquerque                                         | 77 (12.2%)                    | 13 (11.7%)                        |         |
| Baltimore                                           | 68 (10.8%)                    | 14 (12.6%)                        |         |
| Boston                                              | 76 (12.1%)                    | 16 (14.4%)                        |         |
| Denver                                              | 90 (14.3%)                    | 8 (7.2%)                          |         |
| San Diego                                           | 70 (11.1%)                    | 6 (5.4%)                          |         |
| Seattle                                             | 90 (14.3%)                    | 18 (16.2%)                        |         |
| St Louis                                            | 90 (14.3%)                    | 15 (13.5%)                        |         |
| Toronto                                             | 69 (11.0%)                    | 21 (18.9%)                        |         |

IQR, Interquartile range.

**TABLE E4.** Baseline predictors of strict asthma remission\*†

| <b>Variable</b>                             | <b>OR</b> | <b>95% CI</b> | <b>P value</b> |
|---------------------------------------------|-----------|---------------|----------------|
| 10% Increase in FEV <sub>1</sub> /FVC ratio | 5.71      | 3.58-9.45     | <.001          |
| Two-fold increase in PC <sub>20</sub>       | 1.52      | 1.26-1.84     | <.001          |
| Two-fold increase in serum IgE level        | 0.88      | 0.78-1.00     | .047           |
| Aeroallergen sensitization on skin testing  | 0.48      | 0.24-0.97     | .04            |

\*Covariates included in the cross-validated model: age, sex, race, CAMP treatment group, clinic site, household income level, history of exacerbations after exercise, and history of exposure to home tobacco smoke.

†Quantitative variables were modeled continuously.
